# Supplementary material
Source: Elsevier journal article supplement (https://www.sciencedirect.com/science/article/pii/S2340932020300104)
Supplement: mmc1 [file S2340932020300104:mmc1.doc]

**Tabla suplementaria I**

**CENTROS PÚBLICOS 2018**

*Obligatorio

# Recursos físicos y humanos

## Nombre del centro: *

**1. Nº Ciclos al año:**

**2. Nº Punciones al año:**

**Tamaño del centro**

**3. Nº de ginecólogos:**

Ejemplo: 2 ginecólogos a tiempo completo y 1 ginecólogo a media jornada = 2.5 (ejemplo válido para las cuestiones que siguen a continuación. Separen los decimales con un punto).

## 4. Nº de embriólogos:

**5. Nº de enfermeras/os:**

**6. Nº de auxiliares clínicos:**

**7. Nº de técnicos especialistas en laboratorio:**

**8. Otros:**

**9. ¿Qué días de la semana realiza punciones?** (Se pueden marcar varias casillas)

*Selecciona todos los que correspondan.*

Lunes Martes Miércoles Jueves Viernes Sábado Domingo

# Nº de incubadoras dedicadas al cultivo de embriones.

**10. Tipo "Convencional"** *Marca solo un óvalo.*

1 2 3 4 5 6 7 8 9 10

10 o más

**11. Tipo "Plana de sobremesa"** *Marca solo un óvalo.*

1 2 3 4 5 6 7 8 9 10

10 o más

## En caso de "Plana de sobremesa", indicar el nº de pacientes por “Plana de sobremesa":

**Protocolo y cartera de servicios**

Las siguientes preguntas piden el porcentaje (%) de cada una de las opciones. Introducir valor numérico del porcentaje (%).

## Programación de ciclos para FIV/ICSI con ACO (%)

**Tipo de protocolo (%)**

Introducir el porcentaje de ciclos de estimulación para FIV/ICSI según el tipo de protocolo de frenación.

## 12. Antagonista

**13. Análogo**

**14.Otros**

**Días de congelación de embriones (%)**

Introducir el porcentaje del total de ciclos con congelación de embriones según el día de congelación.

Ejemplo: 20% en día 2, significa que el 20% de los ciclos con congelación de embriones, estos se congelan en día 2.

**(No es necesario escribir el símbolo de porcentaje (%), sólo el número.**

**15. Día +2**

**16. Día +3**

**17. Día +5**

**18. ¿Realiza alguna de las siguientes técnicas en su centro?**

**No cuentan las derivaciones a otros centros. Marque solo uno por fila**

**SI NO**

**DGP**

**Ovocitos donados propios**

**Banco externo de ovocitos**

**vitrificación de ovocitos pacientes**

**para preservación de fertilidad**
